# Supplementary material for: Housing Conditions and a Challenge with Lipopolysaccharide on the Day of Estrus Can Influence Gene Expression of the Corpus Luteum in Gilts
Source: MDPI journal article supplement (doi:10.3390/genes13050769), 2022-04-26
Supplement: s1 [file s1]

**Table S1.** Swine specific oligonucleotide forward (F) and reverse (R) primer sequence (5'-3'), amplicon length of the evaluated genes, and primer efficiency in the standard curve on qPCR.

| Target name    | GenBank ID     | Primer (5'-3')                                                     | Amplicon | Efficiency (%) | Melting temperature | Reference  |
|----------------|----------------|--------------------------------------------------------------------|----------|----------------|---------------------|------------|
| <i>PGR</i>     | NM_001166488.1 | F: 5' AACACCAAACCCGACACTTC 3'<br>R: 5' CGAAAACCTGGCAGTGACTT 3'     | 107 bp   | 89.80          | 80.22               | This study |
| <i>VEGF</i>    | X81380         | F: 5' CGAAGTGGTGAAGTTCATGG 3'<br>R: 5' ACACAGGACGGCTTGAAGAT 3'     | 120 bp   | 99.07          | 83.96               | This study |
| <i>FLT1</i>    | AJ245445.1     | F: 5' ACCCCGGAAATCTATCAGATCA 3'<br>R: 5' GGTCGCCTAGTTTTTCCACAAG 3' | 94 bp    | 87.97          | 79.63               | This study |
| <i>KDR</i>     | AJ245446.1     | F: 5' CTCAGCAGGATGGCAAAGACTA 3'<br>R: 5' GGGGTCACACACTTCCTCTTCT 3' | 128 bp   | 86.90          | 81.56               | This study |
| <i>STAR</i>    | NM213755       | F: 5' CAGACTTTGGAGAGATGCCTGA 3'<br>R: 5' ATCCCTTGAGGTCAATGCTGAG 3' | 138 bp   | 90.10          | 86.48               | This study |
| <i>CYP11A1</i> | NM_214427.1    | F: 5' CCTGCCAAGACATTGGTACAAG 3'<br>R: 3' AGGTCCCTTTCTTTACCCAACC 3' | 113 bp   | 86.41          | 84.39               | This study |
| <i>HSD3B1</i>  | NM_001004049.1 | F: 5' TGGTCATCCACACTGCCTCTAT 3'<br>R: 5' GGAGCTGGGTACCTTTCACATT 3' | 90 bp    | 91.11          | 83.2                | This study |
| <i>LHCGR</i>   | XM_021085888.1 | F: 5' CATAACCACCGTACCAGCAA 3'<br>R: 5' TTCAGCTCCAGGGAAATCAG 3'     | 135 bp   | 98.80          | 78.13               | This study |
| <i>HSD11B2</i> | AF414125       | F: 5' GCGAAAGCTTCCCACTGAAC 3'<br>R: 5' AGGGTCTGTTTGGGCTCATG 3'     | 59 bp    | 102.63         | 83.2                | [1]        |

|       |                |                                                                  |        |        |       |            |
|-------|----------------|------------------------------------------------------------------|--------|--------|-------|------------|
| NR3C1 | AF141371       | F: 5' GATCATGACCGCACTCAACATG 3'<br>R: 5' TTGCCTTTGCCCATTTTCAC 3' | 68 bp  | 97.11  | 82.31 | [1]        |
| NR3C2 | XM_013978840.2 | F: 5' TTGCCTTGAGCTGGAGATCG 3'<br>R: 5' GAACTGCAGGCTGATCTGGT 3'   | 143 bp | 106.17 | 82.01 | [1]        |
| TNF   | NM_214022.1    | F: 5' GCCCTTCCACCAACGTTTTTC 3'<br>R: 5' CAAGGGCTCTTGATGGCAGA 3'  | 97 bp  | —      | —     | This study |
| IFNG  | NM_213948.1    | F: 5' GCGCAAAGCCATCAGTGAAC 3'<br>R: 5' GCTCTCTGGCCTTGGAACAT 3'   | 105 bp | —      | —     | This study |
| IL1B  | XM_021085847.1 | F: 5' TTTGAAGAAGAGCCCATCATCC 3'<br>R: 5' CCAGCCAGCACTAGAGATTG 3' | 119 bp | 97.98  | 81.41 | [2]        |
| UBB   | U72496.1       | F: 5' ACCAGCAGCGTCTGATTTTTT 3'<br>R: 5' CAAGTGCAGGGTGGACTCTT 3'  | 92 bp  | 100.03 | 82.61 | [3]        |

## References

- Poletto, R.; Steibel, J.P.; Siegford, J.M.; Zanella, A.J. Effects of early weaning and social isolation on the expression of glucocorticoid and mineralocorticoid receptor and 11 $\beta$ -hydroxysteroid dehydrogenase 1 and 2 mRNAs in the frontal cortex and hippocampus of piglets. *Brain Res.* **2006**, *1067*, 36–42, doi:10.1016/j.brainres.2005.10.001.
- Makowczenko, K.G.; Jastrzebski, J.P.; Szeszko, K.; Smolinska, N.; Paukszt, L.; Dobrzyn, K.; Kiezun, M.; Rytelwska, E.; Kaminska, B.; Kaminski, T. Transcription analysis of the chemerin impact on gene expression profile in the luteal cells of gilts. *Genes (Basel)*. **2020**, *11*, 1–18, doi:10.3390/genes11060651.
- Okino, C.H.; Ibelli, A.M.G.; Brentano, L.; Zanella, R.; Groke Marques, M. Evaluation of candidate reference genes for investigation of the uterine tissue and corpus luteum of pigs on day 6 after artificial insemination. *Anim. Reprod. Sci.* **2018**, *198*, 202–209, doi:10.1016/j.anireprosci.2018.09.020.

**Table S2.** Comparisons between independent variables and the interactions, for each of the evaluated genes.

| Target gene    | Housing | Challenge | Housing*Challenge |
|----------------|---------|-----------|-------------------|
| <i>IL1B</i>    | 0.261   | 0.543     | 0.221             |
| <i>LHCGR</i>   | 0.027*  | 0.187     | 0.661             |
| <i>CYP11A1</i> | 0.108   | 0.473     | 0.141             |
| <i>PGR</i>     | 0.067   | 0.897     | 0.492             |
| <i>FLT1</i>    | 0.598   | 0.024*    | 0.144             |
| <i>NR3C2</i>   | 0.256   | 0.214     | 0.081             |
| <i>HSD11B2</i> | 0.162   | 0.835     | 0.238             |
| <i>STAR</i>    | 0.015*  | 0.577     | 0.060             |
| <i>VEGF</i>    | 0.167   | 0.044*    | 0.314             |
| <i>KDR</i>     | 0.292   | 0.487     | 0.513             |
| <i>NR3C1</i>   | 0.479   | 0.602     | 0.687             |
| <i>HSD3B1</i>  | 0.251   | 0.013*    | 0.493             |

\*Significant differences ( $p < 0.05$ ) were represented by an asterisk.
